# Supplementary material
Source: PubMed Central journal article supplement (PMC9389625)
Supplement: NIHMS1824714-supplement-1824714_RS.pdf [file NIHMS1824714-supplement-1824714_RS.pdf]

## Reporting Summary

Nature Portfolio wishes to improve the reproducibility of the work that we publish. This form provides structure for consistency and transparency in reporting. For further information on Nature Portfolio policies, see our [Editorial Policies](#) and the [Editorial Policy Checklist](#).

### Statistics

For all statistical analyses, confirm that the following items are present in the figure legend, table legend, main text, or Methods section.

n/a Confirmed

- The exact sample size ( $n$ ) for each experimental group/condition, given as a discrete number and unit of measurement
- A statement on whether measurements were taken from distinct samples or whether the same sample was measured repeatedly
- The statistical test(s) used AND whether they are one- or two-sided  
*Only common tests should be described solely by name; describe more complex techniques in the Methods section.*
- A description of all covariates tested
- A description of any assumptions or corrections, such as tests of normality and adjustment for multiple comparisons
- A full description of the statistical parameters including central tendency (e.g. means) or other basic estimates (e.g. regression coefficient) AND variation (e.g. standard deviation) or associated estimates of uncertainty (e.g. confidence intervals)
- For null hypothesis testing, the test statistic (e.g.  $F$ ,  $t$ ,  $r$ ) with confidence intervals, effect sizes, degrees of freedom and  $P$  value noted  
*Give  $P$  values as exact values whenever suitable.*
- For Bayesian analysis, information on the choice of priors and Markov chain Monte Carlo settings
- For hierarchical and complex designs, identification of the appropriate level for tests and full reporting of outcomes
- Estimates of effect sizes (e.g. Cohen's  $d$ , Pearson's  $r$ ), indicating how they were calculated

*Our web collection on [statistics for biologists](#) contains articles on many of the points above.*

### Software and code

Policy information about [availability of computer code](#)

#### Data collection

Luciferase/protein concentration/ELISA assay: software installed in POLARstar Omega Microplate Reader (BMG LABTECH)  
 Real-time PCR: software installed in ViiA 7 Real-Time PCR System  
 MRI imaging: software installed in a 7T small animal MRI scanner  
 WB: ChemiDoc MP Imaging System  
 Migrated cells in invasion assay: Tissue culture microscope & EVOS FL color imaging system  
 Images of H&E staining and immunostaining: LEICA DM6000B microscope  
 In vivo time-lapse images of migrating tumor cells: Zeiss LSM780 confocal/multiphoton microscope  
 Time lapse single cell/neurospheres images: Andor spinning disk confocal microscope  
 RNA-sequencing, Whole exome sequencing: NextSeq500

#### Data analysis

Real-time PCR: software installed in ViiA 7 Real-Time PCR System (Applied Biosystems) and GraphPad Prism 8.0.0.  
 Gene Set Enrichment Analysis (GSEA v4.2.1) and ssGSEA v.10.0.1 at <http://software.broadinstitute.org/gsea/index.jsp>.  
 MRI, WB images: ImageJ bundled with Java (v 1.8.0\_112).  
 Sequence alignment and annotation: BWA-MEM, Picardtools (v2.25.5), bedtools (v2.30.0), GATK (v3.8), Samtools(v1.12), WGSAs,  
 RNA-seq analysis: StringTie(v1.3.5), RseqQC(v3.0.0), DESeq2(v1.32.0).  
 Statistical Analysis: GraphPad Prism 8.0.0.  
 Tracking of in vivo cell movements: Imaris 9.0.  
 Tracking of single cell migration movements: ImageJ manual track Plugin (v 1.8.0\_112).  
 The invasion distance of cells out of the neurospheres: ImageJ manual track Plugin (v 1.8.0\_112).  
 Flow cytometry: FlowJo 7.6.

For manuscripts utilizing custom algorithms or software that are central to the research but not yet described in published literature, software must be made available to editors and reviewers. We strongly encourage code deposition in a community repository (e.g. GitHub). See the Nature Portfolio [guidelines for submitting code & software](#) for further information.

## Data

Policy information about [availability of data](#)

All manuscripts must include a [data availability statement](#). This statement should provide the following information, where applicable:

- Accession codes, unique identifiers, or web links for publicly available datasets
- A description of any restrictions on data availability
- For clinical datasets or third party data, please ensure that the statement adheres to our [policy](#)

RNA-seq and WES data that support the findings of this study have been deposited in the NCBI Sequence Read Archive (SRA) with accession number PRJNA812870 and PRJNA827815. Publicly available WES data were from NCBI SRA with accession number PRJNA543854 (SRX5870263).

Previously published microarray data are available in Supplementary Table 1 of Ramnarain et al.1

Mass spectrometry data have been deposited in <https://massive.ucsd.edu/> with Dataset Identifier: MSV000089272.

The human GBM data were derived from the TCGA Research Network: <http://cancergenome.nih.gov/>.

All other data supporting the findings of this study are available from the corresponding author on reasonable request. Source data are provided with this paper.

Ramnarain, D. B., Park, S., Lee, D. Y., Hatanpaa, K. J., Scoggin, S. O., Otu, H., Libermann, T. A., Raisanen, J. M., Ashfaq, R., Wong, E. T., Wu, J., Elliott, R., and Habib, A. A. (2006) Differential gene expression analysis reveals generation of an autocrine loop by a mutant epidermal growth factor receptor in glioma cells, *Cancer Res* 66, 867-874.

## Field-specific reporting

Please select the one below that is the best fit for your research. If you are not sure, read the appropriate sections before making your selection.

- Life sciences       Behavioural & social sciences       Ecological, evolutionary & environmental sciences

For a reference copy of the document with all sections, see [nature.com/documents/nr-reporting-summary-flat.pdf](https://www.nature.com/documents/nr-reporting-summary-flat.pdf)

## Life sciences study design

All studies must disclose on these points even when the disclosure is negative.

|                 |                                                                                                                                                                                                                                                                                                                                                                                                                                                                                                                                                                                                                                                                                                                                                                                                                                                                                     |
|-----------------|-------------------------------------------------------------------------------------------------------------------------------------------------------------------------------------------------------------------------------------------------------------------------------------------------------------------------------------------------------------------------------------------------------------------------------------------------------------------------------------------------------------------------------------------------------------------------------------------------------------------------------------------------------------------------------------------------------------------------------------------------------------------------------------------------------------------------------------------------------------------------------------|
| Sample size     | <p>Sample sizes of animal experiments were based on power analysis. 1. effect size of 1.67 was assumed to display a reduction of 50% tumor size with a standard deviation of 30% 32 days after treatment; 2. 85% power and 5% type I error; 3. Two-sample two-tailed t-test for two independent means.</p> <p>For other experiments, no statistical methods were used to predetermine the sample size. Sample sizes were chosen based on our previous publications and similar studies in this field. (Gong, K. et al. EGFR inhibition triggers an adaptive response by co-opting antiviral signaling pathways in lung cancer, <i>Nature Cancer</i> 1, 394-409(2022); Guo G. et al. A TNF-JNK-Axl-ERK signaling axis mediates primary resistance to EGFR inhibition in glioblastoma, <i>Nat. Neurosci.</i> 20, 1074-1084 (2017).)</p>                                               |
| Data exclusions | No collected data were excluded.                                                                                                                                                                                                                                                                                                                                                                                                                                                                                                                                                                                                                                                                                                                                                                                                                                                    |
| Replication     | <p>Data of the following assays are the results of 3 independent experiments. Matrigel invasion assay, 3D culture and spheroid invasion assay, Scratch wound assay, Brdu incorporation assay, Annexin V/PI positive staining assay, luciferase assay, qPCR, ELISA.</p> <p>The Western blot images are representative of three independent biological replicates.</p> <p>Images of H&amp;E staining and immunostaining, MRI images are representative of indicated number of mouse in animal study.</p> <p>In vivo cell migration images are representative of three mice.</p> <p>Data of single cell migration analysis are representative of two independent experiments.</p> <p>RNA-sequencing was performed by triplicate.</p> <p>Mass spectrum analysis and whole exome sequencing were done once.</p> <p>All replications above have similar results and are reproducible.</p> |
| Randomization   | <p>For in vivo experiments, the mice were randomly divided into control and different treatment groups. All female 4-6 weeks old nude mice were used in the same experiment, surgery, treatment were performed for the same period. For randomization, all mice in one experiment were put together and assigned into different groups randomly.</p> <p>No randomization of samples were involved for other experiments, since randomization is not relevant.</p>                                                                                                                                                                                                                                                                                                                                                                                                                   |
| Blinding        | <p>For quantitative analysis, a subset of data has been analyzed in a double-blind approach, resulting in similar results.</p> <p>Patient data: The person preparing samples and running western blot were unaware of the sample identity, western blot results and survival analysis of the patient were analyzed by another person.</p> <p>For TCGA data analysis, the investigators were not blinded to group allocation during data collection and/or analysis, since no subjective rating of data was involved, all patients meeting the selective critiques described in manuscript would be included in the study.</p> <p>For all other experiments the investigators were blinded to group allocation during data collection and/or analysis.</p>                                                                                                                           |

# Reporting for specific materials, systems and methods

We require information from authors about some types of materials, experimental systems and methods used in many studies. Here, indicate whether each material, system or method listed is relevant to your study. If you are not sure if a list item applies to your research, read the appropriate section before selecting a response.

## Materials & experimental systems

## Methods

| n/a                                 | Involved in the study                                           |
|-------------------------------------|-----------------------------------------------------------------|
| <input type="checkbox"/>            | <input checked="" type="checkbox"/> Antibodies                  |
| <input type="checkbox"/>            | <input checked="" type="checkbox"/> Eukaryotic cell lines       |
| <input checked="" type="checkbox"/> | <input type="checkbox"/> Palaeontology and archaeology          |
| <input type="checkbox"/>            | <input checked="" type="checkbox"/> Animals and other organisms |
| <input checked="" type="checkbox"/> | <input type="checkbox"/> Human research participants            |
| <input checked="" type="checkbox"/> | <input type="checkbox"/> Clinical data                          |
| <input checked="" type="checkbox"/> | <input type="checkbox"/> Dual use research of concern           |

| n/a                                 | Involved in the study                              |
|-------------------------------------|----------------------------------------------------|
| <input checked="" type="checkbox"/> | <input type="checkbox"/> ChIP-seq                  |
| <input type="checkbox"/>            | <input checked="" type="checkbox"/> Flow cytometry |
| <input checked="" type="checkbox"/> | <input type="checkbox"/> MRI-based neuroimaging    |

## Antibodies

### Antibodies used

Antibody Supplier Cat# Lot# Clone # Dilution (WB)

EGFR EDM Millipore 06-847 3524841 Polyclonal 1:1000-2000

EGFR EDM Millipore 04-338 VR1358129 monoclonal IHC 1:200

TGFalpha EDM Millipore GF06 Polyclonal 134A-2B3 1:200

pEGFR(Tyr1068) Cell Signaling Technology 2236 19 1H12 1:1000

pEGFR(Tyr845) Cell Signaling Technology 6963 1 D63B4 1:1000

pEGFR(Tyr1173) Cell Signaling Technology 4407 9 53A5 1:1000

ERK Cell Signaling Technology 4695 28 137F5 1:1000

pERK Cell Signaling Technology 4370 24 D13.14.4E 1:1000

TAK1 Cell Signaling Technology 5206 7 D94D7 1:1000

pTAK1 Cell Signaling Technology 4508 7 90C7 1:1000

EGR1 Cell Signaling Technology 4153 5 15F7 1:1000

FLAG Cell Signaling Technology 2368 4 Polyclonal 1:1000; IP 1:50

STAT1 Cell Signaling Technology 9172 8 Polyclonal 1:1000

Ki67 Cell Signaling Technology 9027 6 D2H10 IHC 1:200

Met Cell Signaling Technology 8198 4 D1C2 1:1000

pMet Cell Signaling Technology 3077 9 D26 1:1000

p65 Cell Signaling Technology 8242 16 D14E12 1:1000

pp65 Cell Signaling Technology 3033 17 93H1 1:1000

pShc Cell Signaling Technology 2431 6 Polyclonal 1:1000

SP1 Cell Signaling Technology 9389 6 D4C3 1:1000; IF, IHC 1:200

pSTAT1 Cell Signaling Technology 9167 15 58D6 1:1000

Stat3 Cell Signaling Technology 12640 4 D3Z2G 1:1000

pStat3 Cell Signaling Technology 9145 43 D3A7 1:1000

CDC42 Cell Signaling Technology 2466 6 11A11 1:1000

RhoA Cell Signaling Technology 2117 5 67B9 1:1000

HA-Tag Cell Signaling Technology 2367 5 6E2 1:1000

FAK Cell Signaling Technology 71433 1 D5O7U 1:1000

pFAK Cell Signaling Technology 8556 5 D20B1 1:1000

Myc-Tag Cell Signaling Technology 2276 2 9B11 1:1000

BIN3 Santa Cruz Biotechnology sc-514396 B2415 C-10 1:1000; IP 1:50

p65 Santa Cruz Biotechnology sc-109 D2407 A 1:1000

TAB1 Santa Cruz Biotechnology sc-166138 K2320 B-3 1:1000

Shc Santa Cruz Biotechnology sc-967 B1420 PG-797 1:1000

B-Actin Santa Cruz Biotechnology sc-47778 H3121 C4 1:1000

pTyr Santa Cruz Biotechnology sc-508 K1616 PY20 1:1000

EMP-1 Abcam ab191181 GR3331257-2 235-1 1:1000

DOCK7 Proteintech 13000-1-AP 15247 Polyclonal 1:1000; IP:1:50

pDOCK7 IBL America 28079 OC-912 NA 1:1000

EGFR (sepharose bead conjugate) Cell Signaling Technology 5735 5 D38B1 1:20

HB-EGF Santa Cruz Biotechnology sc-365182 H0618 H-1 IHC, IF: 1:500

SMI-31 Biologend 801601 B222936 SMI 31 IHC: 1:500

### Validation

EGFR(06-847) [https://www.emdmillipore.com/US/en/product/Anti-EGFR-Antibody,MM\\_NF-06-847](https://www.emdmillipore.com/US/en/product/Anti-EGFR-Antibody,MM_NF-06-847)

EGFR(04-338) <https://www.citeab.com/antibodies/220389-04-338-anti-egfr-antibody-rabbit-monoclonal>

TGFalpha(GF06) [https://www.emdmillipore.com/US/en/product/Anti-TGF-Ab-1-Mouse-mAb-134A-2B3,EMD\\_BIO-GF06](https://www.emdmillipore.com/US/en/product/Anti-TGF-Ab-1-Mouse-mAb-134A-2B3,EMD_BIO-GF06)

pEGFR(Tyr1068)(2236) <https://www.cellsignal.com/products/primary-antibodies/phospho-egf-receptor-tyr1068-1h12-mouse-mab/2236>

pEGFR(Tyr845)(6963) <https://www.cellsignal.com/products/primary-antibodies/phospho-egf-receptor-tyr845-d63b4-rabbit-mab/6963>

pEGFR(Tyr1173)(4407) <https://www.cellsignal.com/products/primary-antibodies/phospho-egf-receptor-tyr1173-53a5-rabbit-mab/4407>  
 ERK(4695) <https://www.cellsignal.com/products/primary-antibodies/p44-42-mapk-erk1-2-137f5-rabbit-mab/4695>  
 pERK(4370) <https://www.cellsignal.com/products/primary-antibodies/phospho-p44-42-mapk-erk1-2-thr202-tyr204-d13-14-4e-xp-rabbit-mab/4370>  
 TAK1(5206) <https://www.cellsignal.com/products/primary-antibodies/tak1-d94d7-rabbit-mab/5206>  
 pTAK1(4508) <https://www.cellsignal.com/products/primary-antibodies/phospho-tak1-thr184-187-90c7-rabbit-mab/4508>  
 EGR1(4153) <https://www.cellsignal.com/products/primary-antibodies/egr1-15f7-rabbit-mab/4153>  
 FLAG(2368) <https://www.cellsignal.com/products/primary-antibodies/dykdddk-tag-antibody-binds-to-same-epitope-as-sigma-s-anti-flag-m2-antibody/2368>  
 STAT1(9172) <https://www.cellsignal.com/products/primary-antibodies/stat1-antibody/9172>  
 Ki67(9027) <https://www.cellsignal.com/products/primary-antibodies/ki-67-d2h10-rabbit-mab-ihc-specific/9027>  
 Met(8198) <https://www.cellsignal.com/products/primary-antibodies/met-d1c2-xp-rabbit-mab/8198>  
 pMet(3077) <https://www.cellsignal.com/products/primary-antibodies/phospho-met-tyr1234-1235-d26-xp-rabbit-mab/3077>  
 p65(8242) <https://www.cellsignal.com/products/primary-antibodies/nf-kb-p65-d14e12-xp-rabbit-mab/8242>  
 pp65(3033) <https://www.cellsignal.com/products/primary-antibodies/phospho-nf-kb-p65-ser536-93h1-rabbit-mab/3033>  
 pShc(2431) <https://www.cellsignal.com/products/primary-antibodies/phospho-shc-tyr317-antibody/2431>  
 SP1(9389) <https://www.cellsignal.com/products/primary-antibodies/sp1-d4c3-rabbit-mab/9389>  
 pSTAT1(9167) <https://www.cellsignal.com/products/primary-antibodies/phospho-stat1-tyr701-58d6-rabbit-mab/9167>  
 Stat3(12640) <https://www.cellsignal.com/products/primary-antibodies/stat3-d3z2g-rabbit-mab/12640>  
 pStat3(9145) <https://www.cellsignal.com/products/primary-antibodies/phospho-stat3-tyr705-d3a7-xp-rabbit-mab/9145>  
 CDC42(2466) <https://www.cellsignal.com/products/primary-antibodies/cdc42-11a11-rabbit-mab/2466>  
 RhoA(2117) <https://www.cellsignal.com/products/primary-antibodies/rhoa-67b9-rabbit-mab/2117>  
 HA-Tag(2367) <https://www.cellsignal.com/products/primary-antibodies/ha-tag-6e2-mouse-mab/2367>  
 FAK(71433) <https://www.cellsignal.com/products/primary-antibodies/fak-d5o7u-xp-rabbit-mab/71433>  
 pFAK(8556) <https://www.cellsignal.com/products/primary-antibodies/phospho-fak-tyr397-d20b1-rabbit-mab/8556>  
 Myc-Tag(2276) <https://www.cellsignal.com/products/primary-antibodies/myc-tag-9b11-mouse-mab/2276>  
 BIN3(sc-514396) <https://www.scbt.com/p/bin3-antibody-c-10?requestFrom=search>  
 p65(sc-109) <https://www.scbt.com/p/nfkappab-p65-antibody-a?requestFrom=search>  
 TAB1(sc-1466138) <https://www.scbt.com/p/tab1-antibody-b-3?requestFrom=search>  
 Shc(sc-967) <https://www.scbt.com/p/shc-antibody-pg-797?requestFrom=search>  
 B-Actin(sc-47778) <https://www.scbt.com/p/beta-actin-antibody-c4?requestFrom=search>  
 pTyr(sc-508) <https://www.scbt.com/p/p-tyr-antibody-py20?requestFrom=search>  
 EMP-1(ab191181) <https://www.abcam.com/human-nuclear-antigen-antibody-235-1-ab191181.html>  
 DOCK7(13000-1-AP) <https://www.ptglab.com/products/DOCK7-Antibody-13000-1-AP.htm>  
 pDOCK7(28079) <https://www.ibl-america.com/dock7-y1118-phosphorylated-anti-human-rabbit-igg-affinity-purify/>  
 EGFR (sepharose bead conjugate)(5735) <https://www.cellsignal.com/products/wb-ip-reagents/egf-receptor-d38b1-xp-rabbit-mab-sepharose-bead-conjugate/5735>  
 HB-EGF(sc-365182) <https://www.scbt.com/p/hb-egf-antibody-h-1>  
 SMI-31(801601) <https://www.biolegend.com/en-us/products/purified-anti-neurofilament-h-nf-h-phosphorylated-antibody-11476>

## Eukaryotic cell lines

Policy information about [cell lines](#)

Cell line source(s)

All PDXs were obtained from Mayo Clinic Brain Tumor Patient-Derived Xenograft National Resource. Human astrocyte and A431 were purchased from ATCC. U251 was purchased from MilliporeSigma. GBM9 was provided by Dr. James Van Brocklyn. GSC11 was provided by Dr. Shi-Yuan Cheng (Northwestern University). GS622 was provided by Dr. Brent Cochran (Tufts University). U343 GBM was provided by Dr. Luiz Penalva (University of Texas Health Science Center).

Authentication

All PDXs were authenticated using short-tandem repeat profiling by the Mayo Clinic Brain Tumor Patient-Derived Xenograft National Resource. GBM9, GSC11, GS622 and U251 were authenticated by DNA fingerprints for cell-line individualization using Promega StemElite ID system, a short tandem repeat (STR)-based assay, at UT Southwestern genomics core. No authentication was conducted for A431 and U343.

Mycoplasma contamination

Cells were tested for mycoplasma contamination using an e-Myco kit (Boca Scientific). All cell lines are negative for mycoplasma contamination.

Commonly misidentified lines  
(See [ICLAC](#) register)

ICLAC cell lines were not used in this study.

## Animals and other organisms

Policy information about [studies involving animals](#); [ARRIVE guidelines](#) recommended for reporting animal research

Laboratory animals

Nude mice (O88), female, 4-6 weeks old, from Charles River Laboratories (Wilmington, MA).

Wild animals

No wild animals were used in this study.

Field-collected samples

No field-collected samples were used in this study.

## Ethics oversight

All animal studies were done under Institutional Animal Care and Use Committee (IACUC)-approved protocols at UT Southwestern and North Texas VA Medical Center (Dallas, Texas, USA).

Note that full information on the approval of the study protocol must also be provided in the manuscript.

## Flow Cytometry

### Plots

Confirm that:

- The axis labels state the marker and fluorochrome used (e.g. CD4-FITC).
- The axis scales are clearly visible. Include numbers along axes only for bottom left plot of group (a 'group' is an analysis of identical markers).
- All plots are contour plots with outliers or pseudocolor plots.
- A numerical value for number of cells or percentage (with statistics) is provided.

### Methodology

Sample preparation

Cells were plated in 6 well plates and treated with drugs or vehicle alone. After 72 hours cells were trypsinized and washed 2 times with 1× PBS. The cells were incubated for 15 minutes at room temperature with Propidium Iodide and Annexin -V-FLUOS labeling solution in incubation buffer. Annexin and/or PI positive cells were detected by Flow Cytometry.

Instrument

BD FACSCalibur™ Flow Cytometer

Software

Data were analysed with FlowJo software

Cell population abundance

Cell sorting not employed

Gating strategy

Tumor cell population was gated on FSC/SCC plot by removing debris.

- Tick this box to confirm that a figure exemplifying the gating strategy is provided in the Supplementary Information.
