# Supplementary material
Source: PubMed Central journal article supplement (PMC9389625)

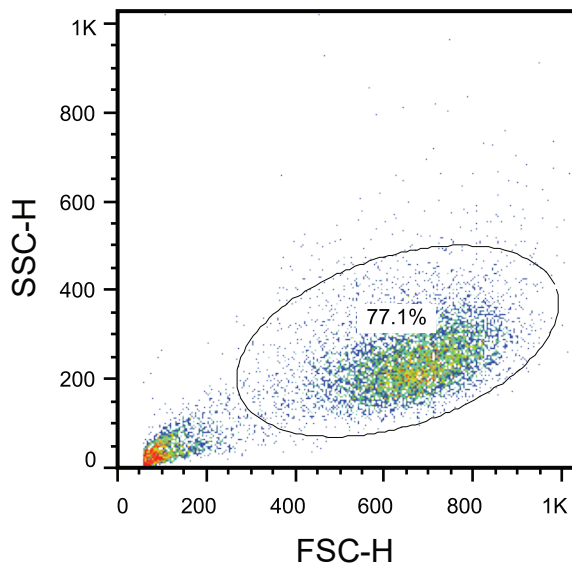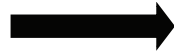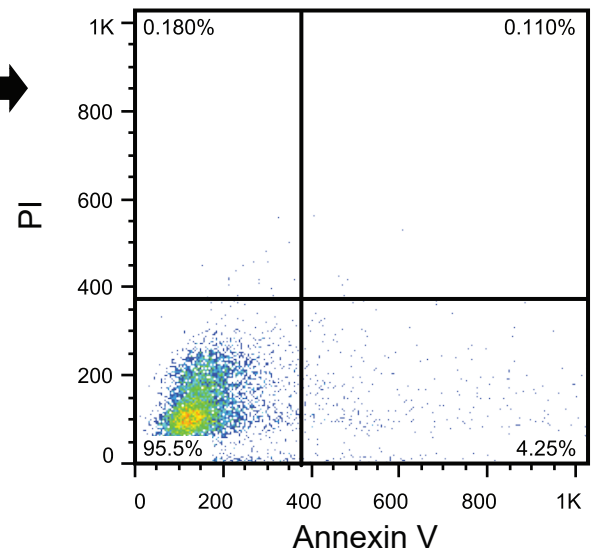

Supplement: NIHMS1824714-supplement-1824714_Sup_Fig_1.pdf [file NIHMS1824714-supplement-1824714_Sup_Fig_1.pdf]
